# Supplementary material
Source: Springer Nature journal article supplement (https://www.springermedizin.de/resource/supplementary/12950_2010_168_MOESM8_ESM.pdf/9558110)

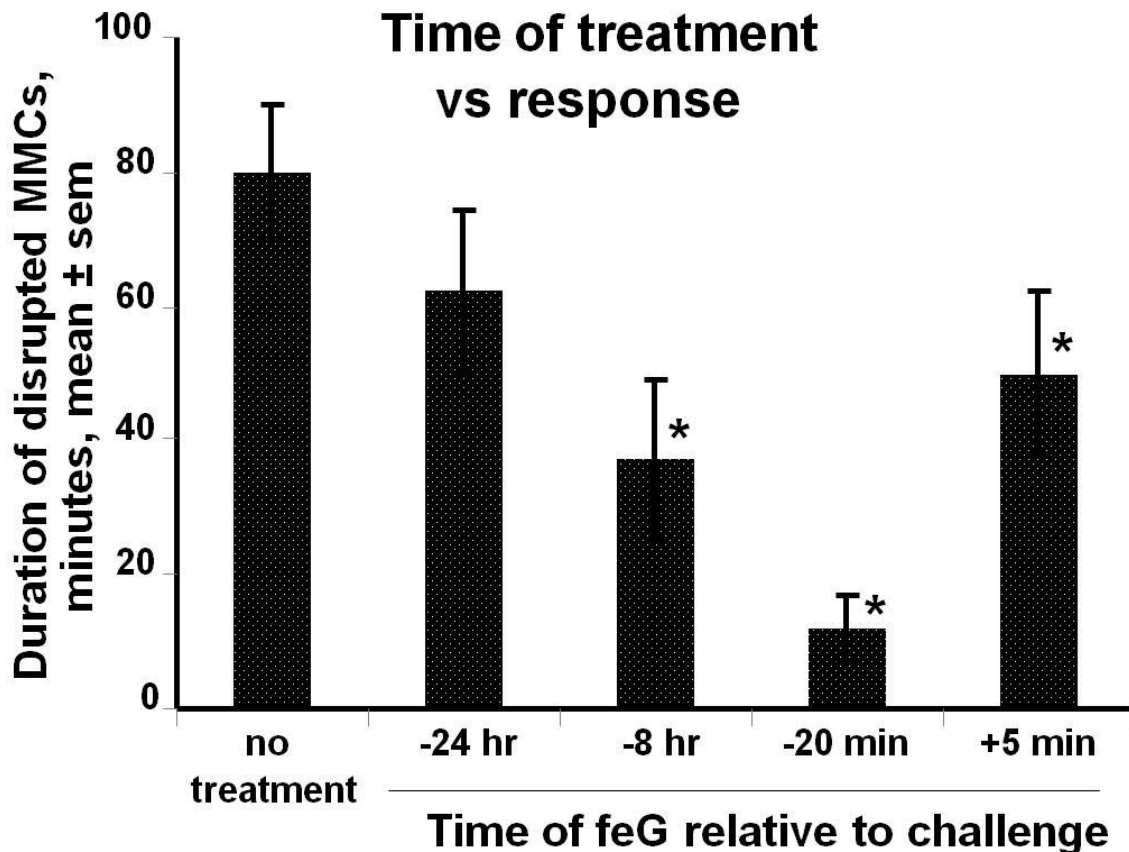

\*  $p < 0.05$  vs  
no treatment

Supplement: MOESM8 [file 9558110]
